# Supplementary material for: Compound library screening identified Akt/PKB kinase pathway inhibitors as potential key molecules for the development of new chemotherapeutics against schistosomiasis
Source: PubMed Central journal article supplement — Int J Parasitol Drugs Drug Resist. 2014 Oct 12;4(3):256–66. doi: 10.1016/j.ijpddr.2014.09.004 (PMC4266776; doi:10.1016/j.ijpddr.2014.09.004), 2014-10-12
Supplement: mmc3.pdf [file mmc3.pdf]

| #   | PubChem ID | Product description                             | Main targets                           | % pairing (24 h) | % pairing (48 h) | % pairing (72 h) | % egg laying (72 h) |
|-----|------------|-------------------------------------------------|----------------------------------------|------------------|------------------|------------------|---------------------|
| A2  | 2044       | AG 1024                                         | IGF-1R, IR                             | 0                | 0                | 0                | 0                   |
| A3  | 9817165    | AGL 2043                                        | PDGFR, Kit                             | 90 ± 5,77        | 66,67 ± 3,33     | 43,33 ± 6,67     | 59,16 ± 9,33        |
| A4  | 5719375    | Akt Inhibitor IV                                | Akt                                    | 0                | 0                | 0                | 1,29 ± 0,67         |
| A5  | 290486     | Akt Inhibitor V, Triciribine                    | Akt                                    | 90               | 80 ± 5,77        | 90               | 81,36 ± 32,27       |
| A6  | 10196499   | Akt Inhibitor VIII, Isozyme-Selective, Akti-1/2 | Akt                                    | 76,67 ± 8,82     | 50 ± 15,28       | 46,67 ± 8,82     | 40,95 ± 5,86        |
| A7  | 16760284   | Akt Inhibitor X                                 | Akt                                    | 10 ± 5,77        | 0                | 3,33 ± 3,33      | 4,06 ± 1,34         |
| A8  | 5113385    | PDK1/Akt/Flt Dual Pathway Inhibitor             | PDK1/Akt, Flt3                         | 0                | 0                | 0                | 4,44 ± 3,4          |
| A9  | 6610278    | Aurora Kinase Inhibitor II                      | Aurora                                 | 83,33 ± 3,33     | 50 ± 5,77        | 36,67 ± 6,67     | 50,15 ± 23,72       |
| A10 | 5311510    | Bcr-abl Inhibitor                               | Bcr-abl                                | 90 ± 5,77        | 43,33 ± 3,33     | 56,67 ± 3,33     | 27,42 ± 8,55        |
| A11 | 2396       | Bisindolylmaleimide I                           | GSK-3                                  | 93,33 ± 3,33     | 73,33 ± 6,67     | 56,67 ± 3,33     | 4,8 ± 2,1           |
| B2  | 2399       | Bisindolylmaleimide IV                          | PKC                                    | 76,66 ± 3,33     | 66,67 ± 8,82     | 30 ± 5,77        | 41,26 ± 0,96        |
| B3  | 2427       | BPIQ-I                                          | EGFR                                   | 90 ± 5,77        | 60 ± 11,55       | 63,33 ± 3,33     | 78,98 ± 39,20       |
| B4  | 72311      | Chelerythrine Chloride                          | PKC                                    | 0                | 0                | 0                | 6,95 ± 4,9          |
| B5  | 2857       | Compound 56                                     | EGFR                                   | 76,67 ± 6,67     | 33,33 ± 3,33     | 13,33 ± 13,33    | 1,48 ± 1,48         |
| B6  | 9860529    | DNA-PK Inhibitor II                             | DNA-PK                                 | 63,33 ± 12,02    | 23,33 ± 6,67     | 30 ± 5,77        | 25,11 ± 10,8        |
| B7  | 9859309    | DNA-PK Inhibitor III                            | DNA-PK, PI3K                           | 86,67 ± 6,67     | 80 ± 10          | 83,33 ± 8,82     | 81,23 ± 46,67       |
| B8  | 9884685    | PI-103                                          | DNA-PK, mTORC1, mTORC2                 | 56,67 ± 20,28    | 16,67 ± 8,82     | 0                | 10,14 ± 5,22        |
| B9  | 657356     | Diacylglycerol Kinase Inhibitor II              | Diacylglycerol Kinase                  | 60 ± 20          | 20 ± 5,77        | 36,67 ± 6,67     | 56,04 ± 6,77        |
| B10 | 5353593    | DMBI                                            | PDGFR, p90                             | 93,33 ± 6,67     | 40 ± 11,55       | 90 ± 5,77        | 58,31 ± 19,58       |
| B11 | 9843206    | EGFR/ErbB-2 Inhibitor                           | EGFR, erbB2                            | 83,33 ± 8,82     | 76,67 ± 3,33     | 46,67 ± 3,33     | 8,82 ± 2,50         |
| C2  | 9549299    | EGFR Inhibitor                                  | EGFR                                   | 63,33 ± 8,82     | 40 ± 11,55       | 10 ± 5,77        | 0,59 ± 0,59         |
| C3  | 11566580   | EGFR/ErbB-2/ErbB-4 Inhibitor                    | EGFR, erbB1, erbB2, erbB4              | 83,33 ± 8,82     | 80 ± 10          | 73,33 ± 14,53    | 2,17 ± 1,37         |
| C4  | 1048845    | Flt-3 Inhibitor                                 | Flt-3                                  | 93,33 ± 6,67     | 86,67 ± 6,67     | 83,33 ± 8,82     | 0,99 ± 0,19         |
| C5  | 11601743   | Flt-3 Inhibitor II                              | Flt-3                                  | 83,33 ± 3,33     | 66,67 ± 6,67     | 63,33 ± 12,02    | 22,06 ± 7,94        |
| C6  | 11617559   | cFMS Receptor Tyrosine Kinase Inhibitor         | FMS                                    | 100              | 100              | 86,67 ± 3,33     | 52,17 ± 3,93        |
| C7  | 3501       | Gö 6976                                         | PKC                                    | 70 ± 15,28       | 33,33 ± 18,56    | 33,33 ± 18,56    | 10,45 ± 5,75        |
| C8  | 3499       | Gö 6983                                         | PKC                                    | 93,33 ± 3,33     | 76,67 ± 14,53    | 70 ± 11,55       | 21,39 ± 4,49        |
| C9  | 3385203    | GTP-14564                                       | FMS, Kit, Flt3, PDGFR                  | 96,67 ± 3,33     | 80 ± 10          | 76,67 ± 13,33    | 80,46 ± 71,05       |
| C10 | 16760502   | Herbimycin A, Streptomyces sp.                  | Src                                    | 36,67 ± 8,82     | 23,33 ± 6,67     | 6,67 ± 3,33      | 2,7 ± 2,7           |
| C11 | 11772958   | Flt-3 Inhibitor III                             | Flt-3, Kit, KDR, Abl, Cdk1, Src, Tie-2 | 53,33 ± 6,67     | 36,67 ± 3,33     | 6,67 ± 3,33      | 5,46 ± 0,75         |
| D2  | 9549305    | IGF-1R Inhibitor II                             | IGF-1R                                 | 86,67 ± 13,33    | 30 ± 5,77        | 0                | 4,08 ± 0,68         |
| D3  | 11983295   | IRAK-1/4 Inhibitor                              | IRAK-1, IRAK-4                         | 93,33 ± 3,33     | 86,67 ± 8,82     | 63,33 ± 17,64    | 36,56 ± 37,04       |
| D4  | 5494425    | JAK Inhibitor I                                 | JAK1, JAK2, Tyk2                       | 100              | 100              | 100              | 28,99 ± 2,81        |
| D5  | 3795       | JAK3 Inhibitor I                                | JAK3                                   | 96,67 ± 3,33     | 83,33 ± 12,02    | 80 ± 10          | 74,32 ± 54,08       |
| D6  | 176406     | JAK3 Inhibitor IV                               | JAK1, JAK3, EGFR                       | 96,67 ± 3,33     | 80 ± 10          | 90 ± 5,77        | 87,93 ± 20,07       |
| D7  | 16760524   | JAK3 Inhibitor VI                               | JAK3                                   | 20               | 10               | 6,67 ± 3,33      | 0,55 ± 0,55         |
| D8  | 6603792    | Lck Inhibitor                                   | Lck, KDR, Tie-2                        | 93,33 ± 3,33     | 50 ± 20          | 36,67 ± 12,02    | 18,12 ± 3,32        |
| D9  | 3973       | LY 294002                                       | PI3K                                   | 90 ± 10          | 73,33 ± 21,86    | 80 ± 20          | 104,72 ± 72,58      |
| D10 | 3971       | LY 303511                                       | Negative control of LY 294002          | 100              | 80 ± 15,28       | 70 ± 20,82       | 112,46 ± 38,65      |
| D11 | 9549297    | Met Kinase Inhibitor                            | Met                                    | 70 ± 20,82       | 0                | 0                | 21,81 ± 12,29       |
| E2  | 4707       | PD 158780                                       | EGFR                                   | 30 ± 25,17       | 6,67 ± 6,67      | 10 ± 5,77        | 2,65 ± 2,65         |
| E3  | 4709       | PD 174265                                       | EGFR                                   | 86,67 ± 8,82     | 76,67 ± 18,56    | 66,67 ± 23,33    | 29,44 ± 3,86        |
| E4  | 5330548    | PDGF Receptor Tyrosine Kinase Inhibitor II      | PDGFR                                  | 96,66 ± 3,33     | 93,33 ± 6,67     | 86,67 ± 13,33    | 31,28 ± 1,28        |
| E5  | 10907042   | PDGF Receptor Tyrosine Kinase Inhibitor III     | PDGFR, Kit, Flt-3                      | 90 ± 10          | 83,33 ± 6,67     | 53,33 ± 8,82     | 10,63 ± 3,33        |
| E6  | 9797370    | PDGF Receptor Tyrosine Kinase Inhibitor IV      | PDGFR, Abl, Lck, Src, Fyn              | 70 ± 25,17       | 73,33 ± 26,67    | 56,67 ± 24,04    | 0                   |
| E7  | 16760609   | PDGFR RTK Inhibitor                             | PDGFR, Kit                             | 66,67 ± 3,33     | 23,33 ± 6,67     | 6,67 ± 6,67      | 12,56 ± 2,56        |
| E8  | 6490494    | PKR Inhibitor                                   | PKR                                    | 16,67 ± 12,02    | 6,67 ± 6,67      | 6,67 ± 6,67      | 9,82 ± 1,82         |
| E9  | 16760619   | PKR Inhibitor, Negative Control                 | Negative control of PKR inhibitor      | 86,67 ± 8,82     | 76,67 ± 12,02    | 70 ± 20,82       | 101,26 ± 4,56       |
| E10 | 5289247    | PI 3-Kg Inhibitor                               | PI3K                                   | 93,33 ± 6,67     | 86,67 ± 13,33    | 86,67 ± 13,33    | 98,58 ± 2,58        |
| E11 | 5287855    | PI 3-Kb Inhibitor II                            | PI3K                                   | 83,33 ± 16,67    | 83,33 ± 16,67    | 83,33 ± 16,67    | 91,17 ± 20,47       |
| F2  | 4879       | PP3                                             | EGFR                                   | 90 ± 5,77        | 83,33 ± 6,67     | 83,33 ± 6,67     | 80,65 ± 3,35        |
| F3  | 5154691    | PP1 Analog II, 1NM-PP1                          | Fyn, Src                               | 73,33 ± 21,86    | 40 ± 15,28       | 6,67 ± 3,33      | 6,7 ± 3,3           |
| F4  | 6711154    | PKCβII/EGFR Inhibitor                           | EGFR, PKC                              | 0                | 3,33 ± 3,33      | 6,67 ± 6,67      | 49,5 ± 9,2          |
| F5  | 6419755    | PKCβ Inhibitor                                  | PKC                                    | 23,33 ± 3,33     | 3,33 ± 3,33      | 3,33 ± 3,33      | 5 ± 5               |
| F6  | 16760631   | Rapamycin                                       | p70S6K                                 | 60 ± 15,28       | 20 ± 10          | 20 ± 20          | 32,8                |
| F7  | 644354     | Rho Kinase Inhibitor III, Rockout               | Rho kinase                             | 90 ± 10          | 80 ± 15,28       | 60 ± 17,32       | 82,75 ± 5,45        |
| F8  | 16760635   | Rho Kinase Inhibitor IV                         | ROCKII, PKG, Aurora A, CaMKII          | 90 ± 5,77        | 86,67 ± 8,82     | 83,33 ± 12,02    | 103,8 ± 0,2         |
| F9  | 16760627   | Staurosporine, N-benzoyl-                       | PKC, PDGFR, VEGFR, Syk                 | 0                | 0                | 0                | 5,9 ± 5,9           |
| F10 | 1474853    | Src Kinase Inhibitor I                          | Src, Lck, VEGFR, FMS                   | 63,33 ± 17,64    | 53,33 ± 6,67     | 53,33 ± 8,82     | 10,15 ± 3,45        |
| F11 | 5329103    | SU11652                                         | PDGFR, VEGFR, FGFR, Kit                | 23,33 ± 12,02    | 0                | 0                | 0,45 ± 0,45         |
| G2  | 6419747    | Syk Inhibitor                                   | Syk                                    | 90               | 73,33 ± 8,82     | 70 ± 10          | 11,77 ± 3,33        |
| G3  | 16760670   | Syk Inhibitor II                                | Syk, PKC                               | 83,33 ± 6,67     | 63,33 ± 16,67    | 56,67 ± 17,64    | 40,83 ± 10,25       |
| G4  | 672296     | Syk Inhibitor III                               | Syk, Src                               | 6,67 ± 6,67      | 0                | 0                | 0,43 ± 0,26         |
| G5  | 447966     | TGF-β RI Kinase Inhibitor                       | TGF-βR, p38 MAPK                       | 100              | 90 ± 10          | 86,67 ± 8,82     | 75,67 ± 32,86       |
| G6  | 16079009   | TGF-β RI Inhibitor III                          | TGF-βR, p38 MAPK                       | 0                | 0                | 0                | 37,9 ± 8,75         |
| G7  | 2063       | AG 9                                            | EGFR                                   | 100              | 93,33 ± 6,67     | 90 ± 10          | 137,7 ± 72,5        |
| G8  | 5328779    | AG 490                                          | EGFR                                   | 100              | 96,67 ± 3,33     | 96,67 ± 3,33     | 97 ± 23,83          |
| G9  | 5328804    | AG 112                                          | EGFR                                   | 100              | 100              | 96,67 ± 3,33     | 42,93 ± 18,15       |
| G10 | 2048       | AG 1295                                         | PDGFR                                  | 93,33 ± 3,33     | 96,67 ± 3,33     | 86,67 ± 8,82     | 56,6 ± 12,16        |
| G11 | 2049       | AG 1296                                         | PDGFR                                  | 96,67 ± 3,33     | 93,33 ± 3,33     | 90               | 45,4 ± 38,3         |
| H2  | 2051       | AG 1478                                         | EGFR                                   | 96,67 ± 3,33     | 96,67 ± 3,33     | 96,67 ± 3,33     | 16,37 ± 3,46        |
| H3  | 6419834    | VEGF Receptor 2 Kinase Inhibitor I              | VEGFR                                  | 93,33 ± 3,33     | 43,33 ± 3,33     | 30 ± 10          | 25,77 ± 3,44        |
| H4  | 9797919    | VEGF Receptor Tyrosine Kinase Inhibitor II      | VEGFR                                  | 93,33 ± 3,33     | 30 ± 10          | 16,67 ± 8,82     | 18,6 ± 6,05         |
| H5  | 99453618   | VEGFR Tyrosine Kinase Inhibitor IV              | VEGFR, Kit, Src, EGFR                  | 90 ± 5,77        | 40               | 33,33 ± 6,67     | 15,37 ± 7,62        |
| H6  | 5329155    | VEGF Receptor 2 Kinase Inhibitor II             | VEGFR, EphB2, PDGFR, Kit, Tie-2        | 90 ± 10          | 23,33 ± 18,56    | 6,67 ± 6,67      | 1,53 ± 0,33         |
| H7  | 5329098    | VEGF Receptor 2 Kinase Inhibitor III            | VEGFR                                  | 100              | 96,67 ± 3,33     | 86,67 ± 8,82     | 70,8 ± 17,91        |
| H8  | 5329468    | VEGF Receptor 2 Kinase Inhibitor IV             | VEGFR                                  | 93,33 ± 3,33     | 96,67 ± 3,33     | 93,33 ± 3,33     | 71,47 ± 18,54       |
| H9  | 16760391   | DNA-PK Inhibitor V                              | DNA-PK, PI3K                           | 90 ± 5,77        | 86,67 ± 8,82     | 80 ± 5,77        | 49,5 ± 17,91        |
| H10 | 9549303    | Aurora Kinase Inhibitor III                     | Aurora A, Lck, Bmx, IGF-1R, Syk        | 93,33 ± 3,33     | 73,33 ± 16,67    | 63,33 ± 12,02    | 5,4 ± 1,63          |
| H11 | 451705     | Staurosporine, Streptomyces sp.                 | PKC, MLCK, PKA, PKG, CaMK              | 40 ± 5,77        | 26,67 ± 3,33     | 26,67 ± 3,33     | 0,17 ± 0,17         |
