# Supplementary material for: Compound library screening identified Akt/PKB kinase pathway inhibitors as potential key molecules for the development of new chemotherapeutics against schistosomiasis
Source: PubMed Central journal article supplement — Int J Parasitol Drugs Drug Resist. 2014 Oct 12;4(3):256–66. doi: 10.1016/j.ijpddr.2014.09.004 (PMC4266776; doi:10.1016/j.ijpddr.2014.09.004), 2014-10-12
Supplement: mmc4.pdf [file mmc4.pdf]

| #  | Structure                                                                           | Name                                      | Molecular formula      | ATP competitive | References                     |
|----|-------------------------------------------------------------------------------------|-------------------------------------------|------------------------|-----------------|--------------------------------|
| A4 | 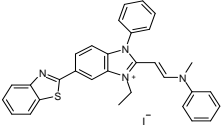   | Akt inhibitor IV                          | $C_{31}H_{27}N_4S$     | Yes             | Kau <i>et al.</i> , 2003       |
| A5 |    | Akt inhibitor V<br>Triciribin             | $C_{13}H_{16}N_6O_4$   | No              | Yang <i>et al.</i> , 2004      |
| A6 |    | Akt inhibitor VIII                        | $C_{34}H_{29}N_7O$     | No              | Barnett <i>et al.</i> , 2005   |
| A7 |    | Akt inhibitor X                           | $C_{20}H_{26}Cl_2N_2O$ | No              | Thimmaiah <i>et al.</i> , 2005 |
| A8 |  | PDK1/Akt/Fit<br>dual pathway<br>inhibitor | $C_{10}H_4N_6O$        | Unknown         | Zeng <i>et al.</i> , 2006      |
