# Supplementary figures and images for: Compound library screening identified Akt/PKB kinase pathway inhibitors as potential key molecules for the development of new chemotherapeutics against schistosomiasis
Source: PubMed Central journal article supplement — Int J Parasitol Drugs Drug Resist. 2014 Oct 12;4(3):256–66. doi: 10.1016/j.ijpddr.2014.09.004 (PMC4266776; doi:10.1016/j.ijpddr.2014.09.004), 2014-10-12

**Akt inhibitor V (A5)**

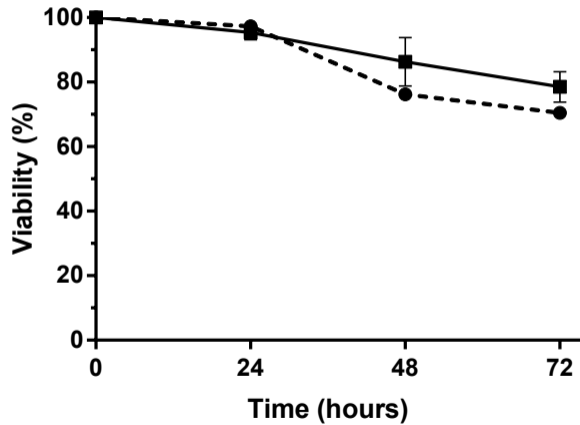

**Akt inhibitor VIII (A6)**

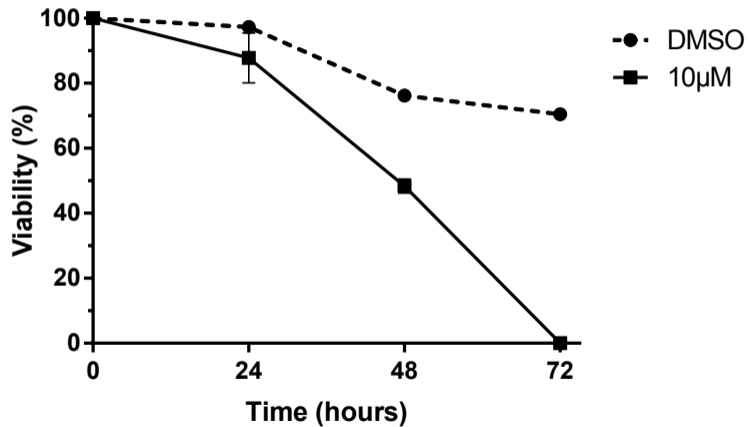

Supplement: mmc2.pdf [file mmc2.pdf]
